# Supplementary material for: Crude Fucoidan Extracts Impair Angiogenesis in Models Relevant for Bone Regeneration and Osteosarcoma via Reduction of VEGF and SDF-1
Source: PubMed Central journal article supplement (PMC5484136; doi:10.3390/md15060186), 2017-06-20
Supplement: marinedrugs-15-00186-s001.pdf [file marinedrugs-15-00186-s001.pdf]

# Supplementary Materials: Crude Fucoidan Extracts Impair Angiogenesis in Models Relevant for Bone Regeneration and Osteosarcoma via Reduction of VEGF and SDF-1

Fanlu Wang, Harald Schmidt, Dijana Pavleska, Thees Wermann, Andreas Seekamp and Sabine Fuchs

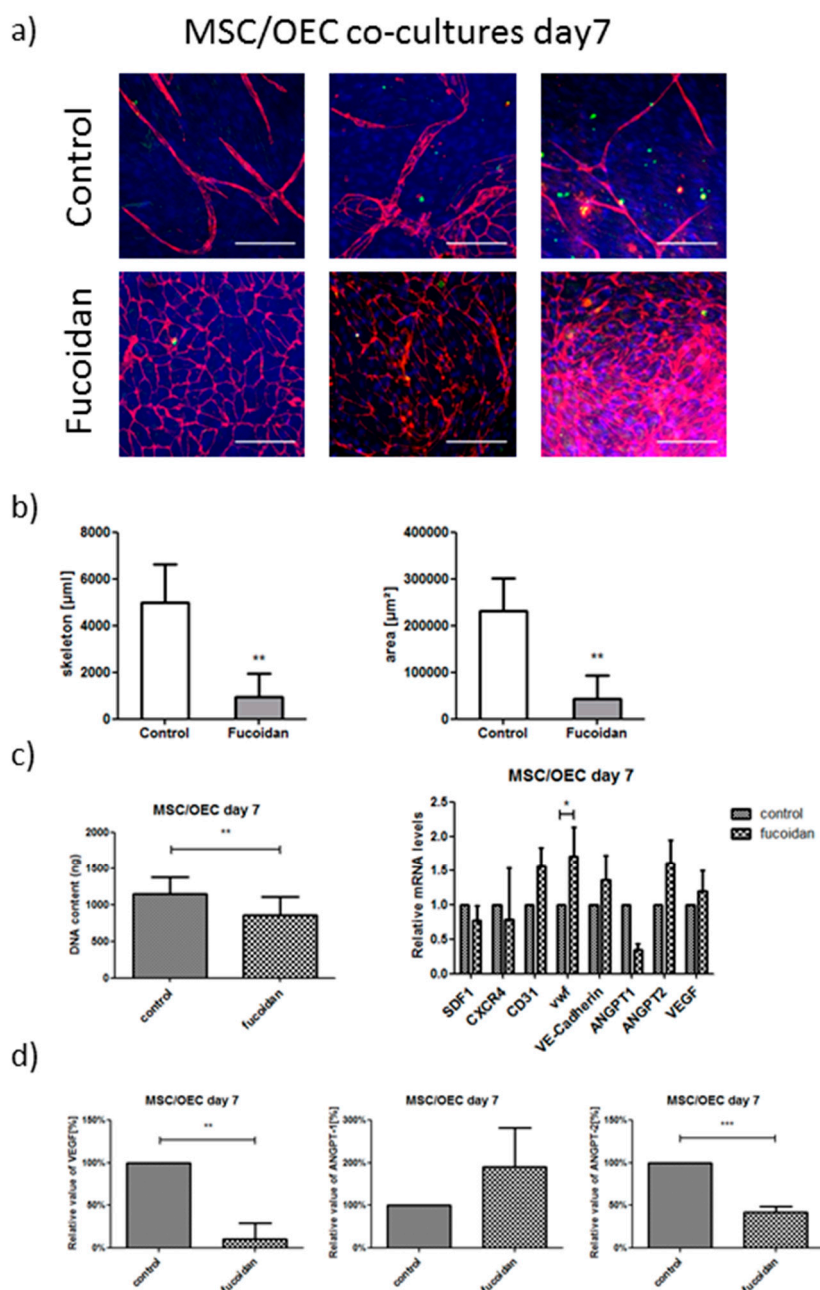

**Figure S1.** MSC/OEC co-cultures on day 7: (a) visualized by confocal laser scanning microscopy (Red: VE-Cadherin, green: CXCR4, blue: Nuclei. The scale bar represents 150 μm.); (b) Quantitative analysis of area and length of pro-angiogenic structures; (c) DNA content, paired *t*-test and relative gene expression of angiogenic factors and endothelial markers, 2 way ANOVA; (d) ELISA for VEGF, ANGPT-1 and ANGPT-2 in the supernatant normalized to the DNA content. \*  $p < 0.05$ , \*\*  $p < 0.01$ , \*\*\*  $p < 0.001$ .  $n = 3$ , paired *t*-test.
